# Supplementary material for: Characterization and Functional Analysis of Extracellular Vesicles and Muscle-Abundant miRNAs (miR-1, miR-133a, and miR-206) in C2C12 Myocytes and mdx Mice
Source: PLoS One. 2016 Dec 15;11(12):e0167811. doi: 10.1371/journal.pone.0167811 (PMC5158003; doi:10.1371/journal.pone.0167811)
Supplement: S1 Table — GC contents and ΔG for mature sequences of myomiRs were estimated. (XLSX) [file pone.0167811.s014.xlsx]

## Sheet: S1 Table.  GC content
	S1 Table. Secondary structure of myomiRs
	myomiRs	mature seq	GC CONTENT	LENGTH	ΔG(kcal.mole-1) 1	ΔG(kcal.mole-1) 2
	mmu-miR-1a-1-5p	acauacuucuuuauaugcccaua	0.304	23	-0.58	0.4
	mmu-miR-1a-3p	uggaauguaaagaaguauguau	0.273	22	2.2	2.3
	mmu-miR-133a-5p	gcugguaaaauggaaccaaau	0.381	21	-1.14	-0.95
	mmu-miR-133a-3p	uuugguccccuucaaccagcug	0.545	22	-1.04	-0.84
	mmu-miR-206-5p	acaugcuucuuuauauccucaua	0.304	23	1.02	1.38
	mmu-miR-206-3p	uggaauguaaggaagugugugg	0.455	22	2.25	2.53
